# Supplementary material for: Loss of ALS2/Alsin Exacerbates Motor Dysfunction in a SOD1H46R-Expressing Mouse ALS Model by Disturbing Endolysosomal Trafficking
Source: PubMed Central journal article supplement (PMC2842444; doi:10.1371/journal.pone.0009805), 2010-03-22
Supplement: pone.0009805.s001.pdf [file pone.0009805.s001.pdf]

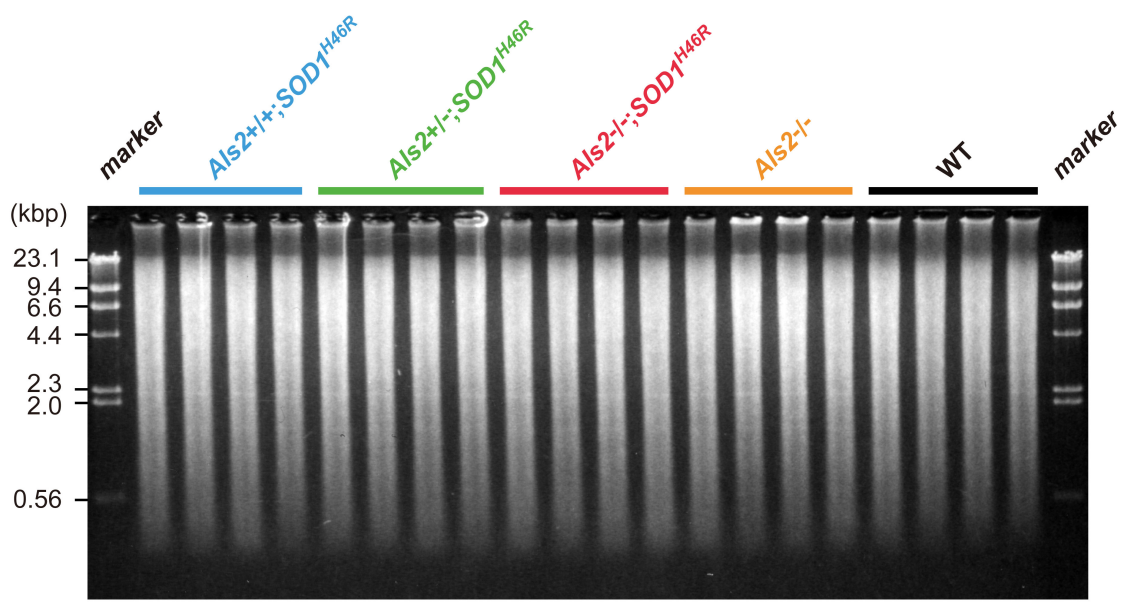

**SOD1<sup>H46R</sup>** ← 3.3 kbp

**Actb** ← 2.0 kbp  
 ← 1.4 kbp
