# Supplementary material for: Loss of ALS2/Alsin Exacerbates Motor Dysfunction in a SOD1H46R-Expressing Mouse ALS Model by Disturbing Endolysosomal Trafficking
Source: PubMed Central journal article supplement (PMC2842444; doi:10.1371/journal.pone.0009805), 2010-03-22

**A**

### Human full-length *ALS2*-tg construct (~12 kb)

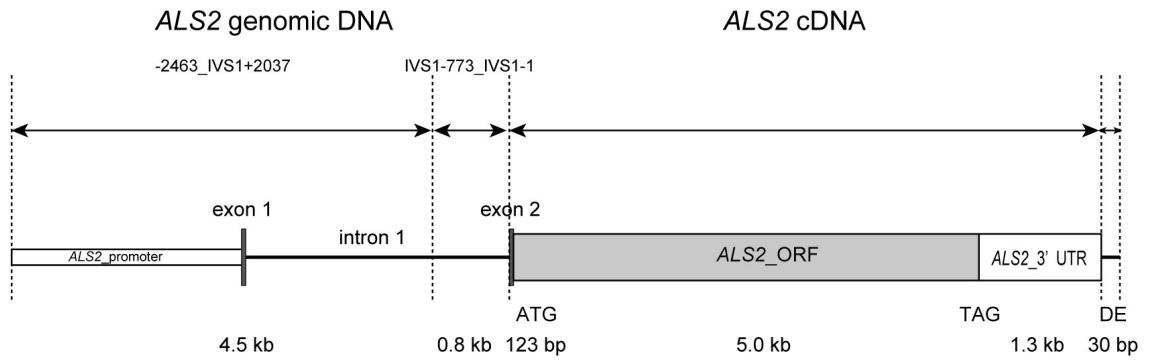**B**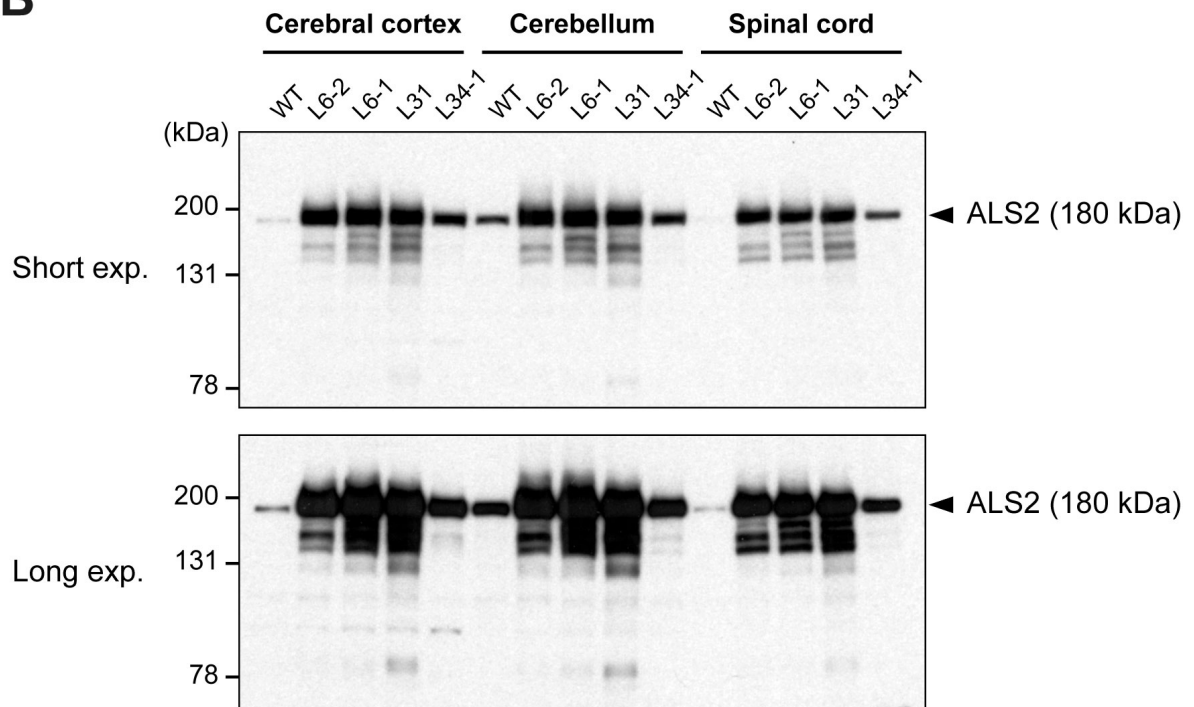

Supplement: pone.0009805.s003.pdf [file pone.0009805.s003.pdf]
