# Supplementary material for: Loss of ALS2/Alsin Exacerbates Motor Dysfunction in a SOD1H46R-Expressing Mouse ALS Model by Disturbing Endolysosomal Trafficking
Source: PubMed Central journal article supplement (PMC2842444; doi:10.1371/journal.pone.0009805), 2010-03-22
Supplement: pone.0009805.s005.pdf [file pone.0009805.s005.pdf]

**A**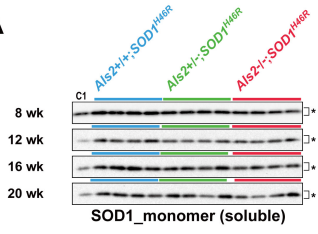**B**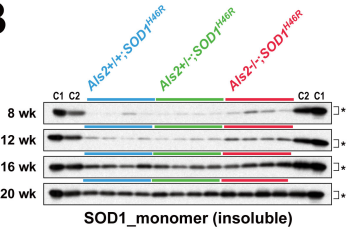**C**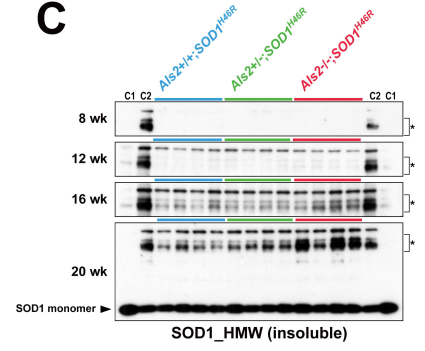**D**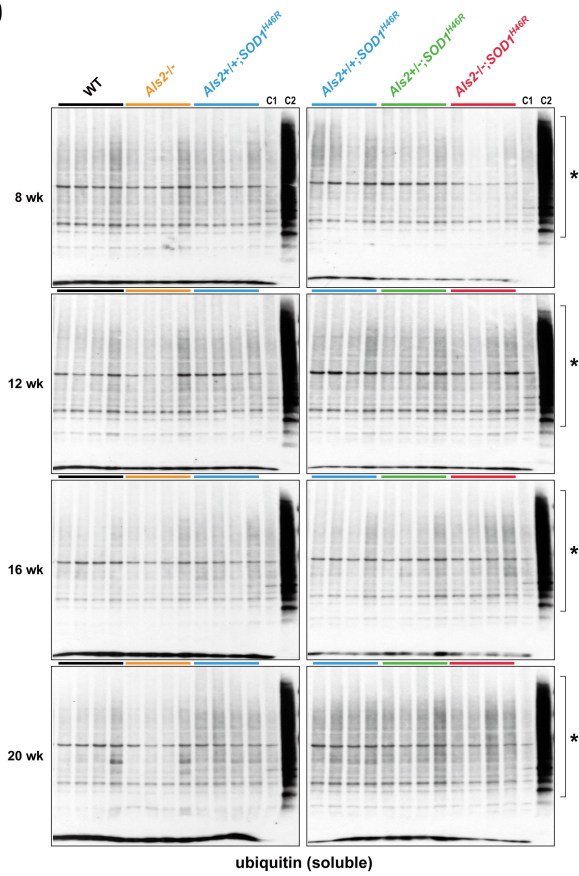**E**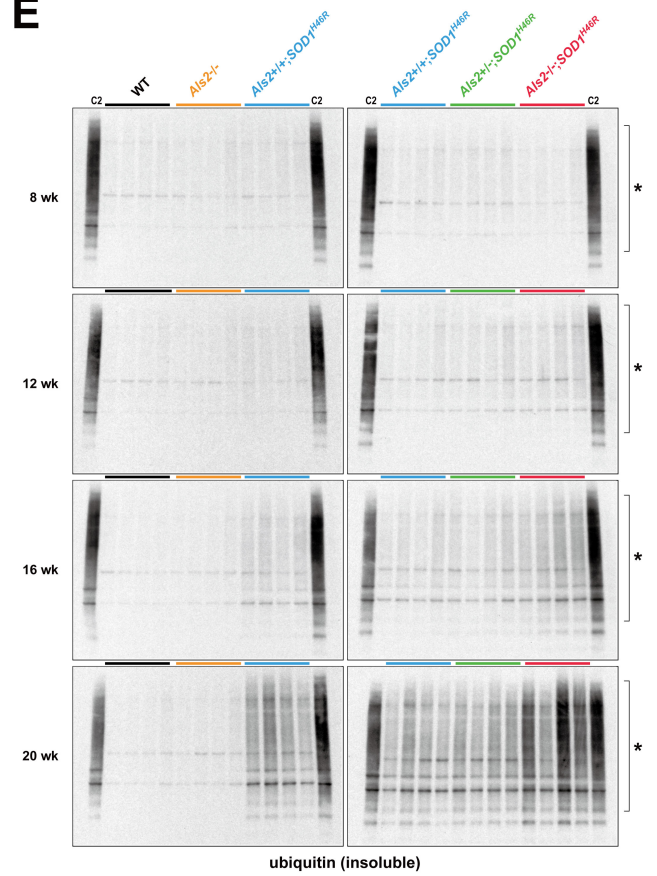

**F**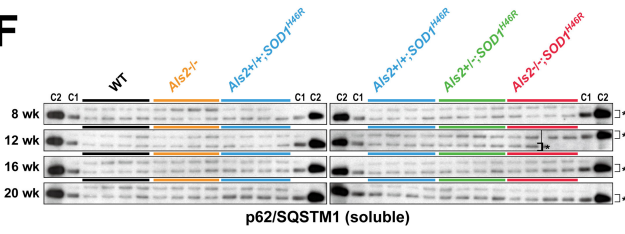

p62/SQSTM1 (soluble)

**G**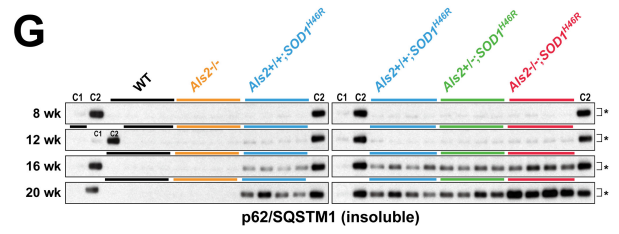

p62/SQSTM1 (insoluble)

**H**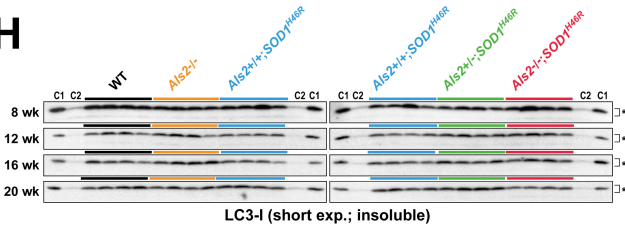

LC3-II (short exp.; insoluble)

**I**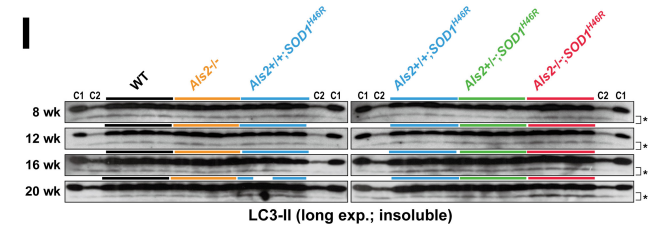

LC3-II (long exp.; insoluble)

**J**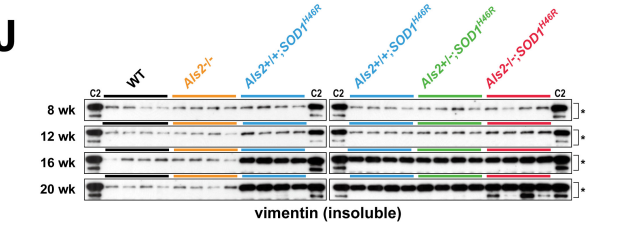

vimentin (insoluble)

**K**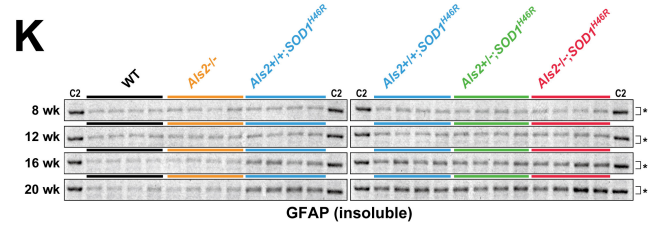

GFAP (insoluble)

**L**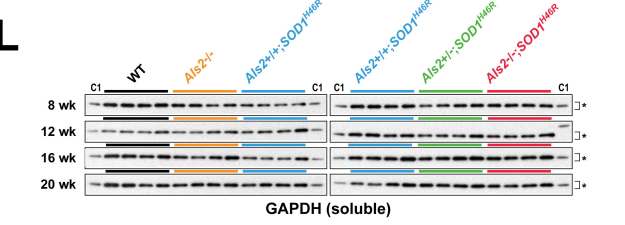

GAPDH (soluble)

**M**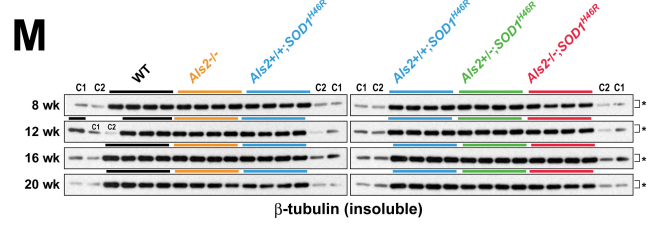

β-tubulin (insoluble)
