# Supplementary material for: Loss of ALS2/Alsin Exacerbates Motor Dysfunction in a SOD1H46R-Expressing Mouse ALS Model by Disturbing Endolysosomal Trafficking
Source: PubMed Central journal article supplement (PMC2842444; doi:10.1371/journal.pone.0009805), 2010-03-22

**A**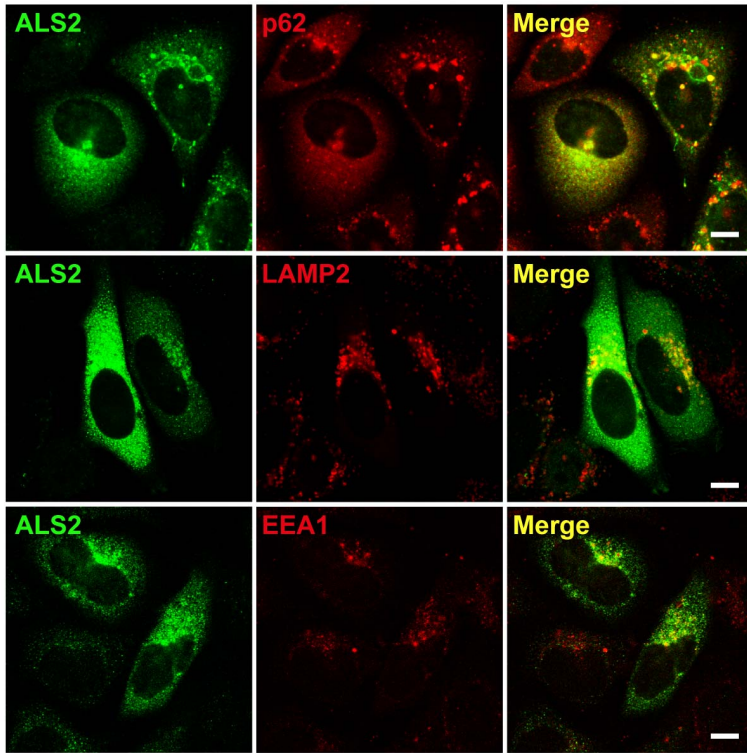**B**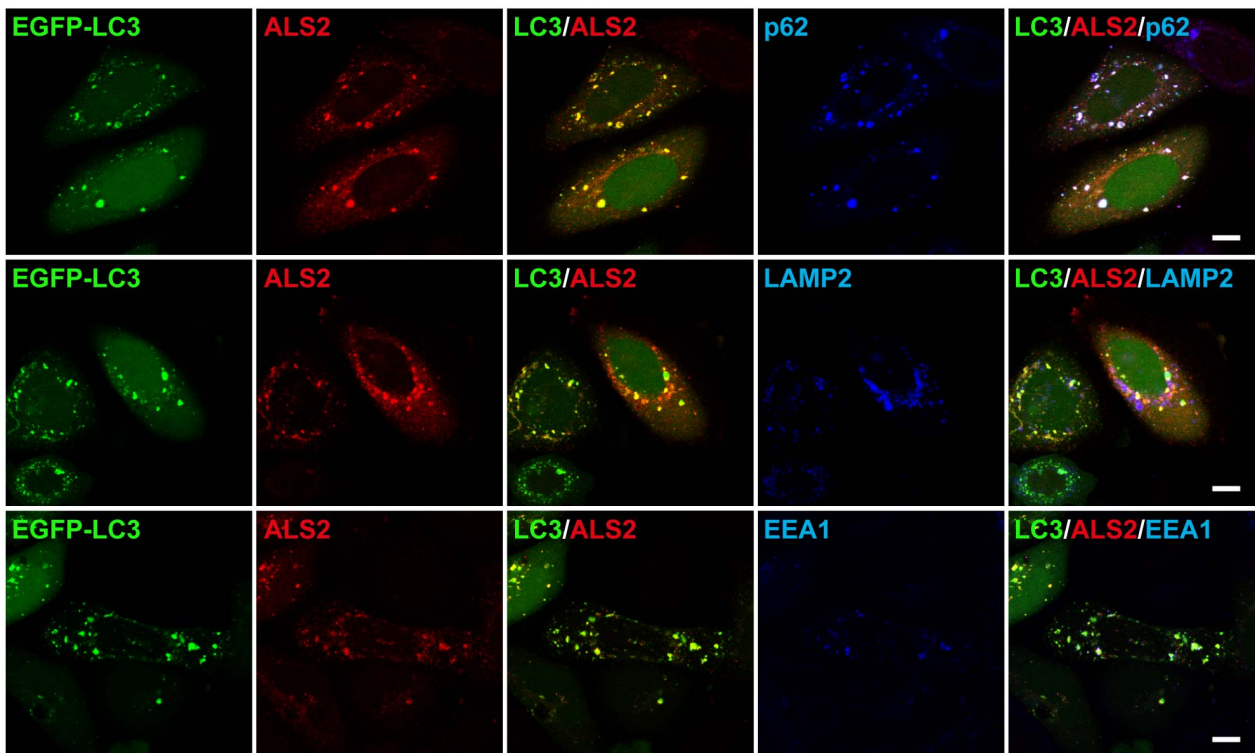

Supplement: pone.0009805.s009.pdf [file pone.0009805.s009.pdf]
