# Supplementary material for: Loss of ALS2/Alsin Exacerbates Motor Dysfunction in a SOD1H46R-Expressing Mouse ALS Model by Disturbing Endolysosomal Trafficking
Source: PubMed Central journal article supplement (PMC2842444; doi:10.1371/journal.pone.0009805), 2010-03-22
Supplement: pone.0009805.s013.pdf [file pone.0009805.s013.pdf]

|                                                          | ratio    |          | female<br>observed<br>(n) | male<br>observed<br>(n) | combined<br>(n) |
|----------------------------------------------------------|----------|----------|---------------------------|-------------------------|-----------------|
|                                                          | expected | observed |                           |                         |                 |
| <i>Als2</i> <sup>+/+</sup> (WT)                          | 0.125    | 0.119    | 33                        | 48                      | 81              |
| <i>Als2</i> <sup>+/-</sup>                               | 0.250    | 0.260    | 80                        | 96                      | 176             |
| <i>Als2</i> <sup>-/-</sup>                               | 0.125    | 0.153    | 51                        | 53                      | 104             |
| <i>Als2</i> <sup>+/+</sup> ; <i>SOD1</i> <sup>H46R</sup> | 0.125    | 0.112    | 30                        | 46                      | 76              |
| <i>Als2</i> <sup>+/-</sup> ; <i>SOD1</i> <sup>H46R</sup> | 0.250    | 0.237    | 85                        | 76                      | 161             |
| <i>Als2</i> <sup>-/-</sup> ; <i>SOD1</i> <sup>H46R</sup> | 0.125    | 0.118    | 44                        | 36                      | 80              |
| total                                                    | 1.000    | 1.000    | 323                       | 355                     | 678             |
